# Supplementary material
Source: Springer Nature journal article supplement (https://www.springermedizin.de/resource/supplementary/12889_2013_6606_MOESM1_ESM.pdf/9498646)
Supplement: MOESM1 [file 9498646]

Distinct references identified (n= 903):

- \* MEDLINE search: 243
- \* Hand search: 16
- \* Cochrane search: 0
- \* Scopus: 644

References excluded (n= 881):

- No original data
- Children, adolescents, pregnant women
- Participants with hemochromatosis, chronic liver disease, liver cirrhosis or chronic renal diseases
- Population with type 1 or type 2 diabetes
- No measures of association for metabolic syndrome or did not study metabolic syndrome as outcome

Distinct references (n=22)

References excluded (n=7):

- Multiple publications from same population: 5
- Lack of data on ferritin for the analysis: 2

Prospective studies (n=2)  
Cross sectional studies (n=12)  
Case-control (n=1)
